# Supplementary material
Source: publisher figshare collection journal article supplement (https://wiley.figshare.com/articles/dataset/_/3559278)
Supplement: Supplementary file 1 [file 1]

## APPENDIX C. Compensatory detection inferred from SECR 2-class finite mixture models applied to various datasets

Here we provide further documentation for the analysis of compensatory heterogeneity in the example datasets provided in version 2.6.1 of the R package ‘secr’ (Efford 2013). The taxa in these examples (Table C1) span a range that complements the large-carnivore focus of the main text. See Efford (2013) and the original sources for descriptions of these studies. We omit the stoat DNA dataset in Efford (2013) because it is too small to fit a mixture model.

We fitted two models to each dataset: a null model ( $\lambda_0 \sim 1, \sigma \sim 1$ ) and a 2-class finite mixture model with variation in both detection parameters ( $\lambda_0 \sim \text{h2}, \sigma \sim \text{h2}$ ). Individuals in a particular latent class shared the same combination of values for  $\lambda_0$  and  $\sigma$ . Models were fitted by maximizing the full likelihood, with other settings as appropriate (see R code at end).

The mixture model enables us to quantify variation in the components of detection and determine the direction of any correlation. The single-detector sampling area ( $a_0 = 2\pi\lambda_0\sigma^2$ ) was computed from the estimated detection parameters of each latent class (the class-specific  $a_0$  may also be estimated directly by fitting a mixture model  $a_0 \sim \text{h2}, \sigma \sim \text{h2}$ ). The CV of each detection parameter in the finite mixture model was computed using Eq. 2 of the main text. The AIC weight of the mixture model relative to the null model was computed following Burnham and Anderson (2002); weights exceeding 0.5 indicate a preference for the mixture model, and weights approaching 1.0 indicate strong relative support for that model. The mixture model was strongly supported for all datasets except ovenbird and possibly

spotted skink (Table C2).

## Literature cited

- Burnham, K. P., and D. R. Anderson. 2002. Model selection and multimodel inference: a practical information-theoretic approach, 2nd edn. Springer, New York, USA.
- Dawson, D. K., and M. G. Efford, M. G. 2009. Bird population density estimated from acoustic signals. *Journal of Applied Ecology* 46:1201–1209.
- Efford, M. G. 2013. **secr**: Spatially explicit capture-recapture models. R package version 2.6.1. <http://CRAN.R-project.org/package=secr>
- Otis, D. L., K. P. Burnham, G. C. White, and D. R. Anderson. 1978. Statistical inference from capture data on closed animal populations. *Wildlife Monographs* No. 62:1–135.
- Royle, J. A., and K. V. Young. 2008. A hierarchical model for spatial capture–recapture data. *Ecology* 89:2281–2289.

Table C1. Example datasets from R package ‘secr’.

| Dataset                   | Species                         | Field method     | Note                  | Source                   |
|---------------------------|---------------------------------|------------------|-----------------------|--------------------------|
| Flat-tailed horned lizard | <i>Phrynosoma macalli</i>       | Area search      |                       | Royle and Young (2008)   |
| Deer mouse ESG            | <i>Peromyscus maniculatus</i>   | Live trapping    | East Stuart Gulch     | Otis et al. (1978)       |
| Deer mouse WSG            | <i>Peromyscus maniculatus</i>   | Live trapping    | Wet Swizer Gulch      | Otis et al. (1978)       |
| House mouse               | <i>Mus musculus</i>             | Live trapping    | mornings only         | Otis et al. (1978)       |
| Speckled skink            | <i>Oligosoma infrapunctatum</i> | Pitfall trapping | two sessions          | Efford et al. unpubl.    |
| Spotted skink             | <i>Oligosoma lineocellatum</i>  | Pitfall trapping | two sessions          | Efford et al. unpubl.    |
| Brushtail possum          | <i>Trichosurus vulpecula</i>    | Live trapping    | includes retag errors | Efford et al. (2005)     |
| Ovenbird                  | <i>Seiurus aurocapilla</i>      | Mist netting     | 2005–2009             | Dawson and Efford (2009) |

Table C2. Heterogeneity in detection parameters estimated by fitting a 2-class finite mixture. Variation is compensatory (‘Comp’) if the class with larger  $\hat{\lambda}_0$  has the smaller  $\hat{\sigma}$ .  $\hat{a}_0$  is computed for each latent class from  $a_0 = 2\pi\hat{\lambda}_0\hat{\sigma}^2$ . ‘AIC wt’ is the weight associated with the heterogeneity model when compared to the null model. ‘PredictedRB’ refers to the relative bias of the null density estimator predicted from  $\widehat{CV}(a_0)$  using the curve fitted to simulated data in the main text (Fig. 2d).

| Dataset                   | $\widehat{CV}(\lambda_0)$ | $\widehat{CV}(\sigma^2)$ | Comp | $\widehat{CV}(a_0)$ | AIC wt | Predicted RB |
|---------------------------|---------------------------|--------------------------|------|---------------------|--------|--------------|
| Flat-tailed horned lizard | 0.76                      | 0.41                     | yes  | 0.13                | 0.96   | +0.00        |
| Deer mouse ESG            | 0.54                      | 0.78                     | yes  | 0.10                | 0.99   | +0.00        |
| Deer mouse WSG            | 0.59                      | 1.24                     | yes  | 0.07                | 1.00   | +0.01        |
| House mouse               | 0.43                      | 1.32                     | yes  | 0.38                | 1.00   | −0.05        |
| Speckled skink            | 0.19                      | 1.33                     | yes  | 0.62                | 1.00   | −0.16        |
| Spotted skink             | 0.52                      | 1.04                     | yes  | 0.23                | 0.82   | −0.01        |
| Brushtail possum          | 0.46                      | 0.96                     | yes  | 0.02                | 1.00   | +0.01        |
| Ovenbird                  | 0.14                      | 0.50                     | no   | 0.73                | 0.37   | −0.23        |

```

library(secr)
## detectfn = 14 selects a halfnormal function for lambda0
FTHL.fit.0 <- secr.fit(hornedlizardCH, model=list(lambda0~1, sigma~1), detectfn = 14)
FTHL.fit.h2h2 <- secr.fit(hornedlizardCH, model=list(lambda0~h2, sigma~h2), detectfn = 14)
FTHL.fit.a0h2 <- secr.fit(hornedlizardCH, model=list(a0~1, sigma~h2), detectfn = 14)

morning <- subset(housemouse, occ = c(1,3,5,7,9)) ## mornings only, following Otis et al. 1978
morning.fit.0 <- secr.fit(morning, buffer = 20, model=list(lambda0~1, sigma~1), detectfn = 14)
morning.fit.h2h2 <- secr.fit(morning, buffer = 20, model=list(lambda0~h2, sigma~h2), detectfn = 14)
morning.fit.a0h2 <- secr.fit(morning, buffer = 20, model=list(a0~1, sigma~h2), detectfn = 14)

oven.fit.0 <- secr.fit(ovenCH, buffer = 300, model=list(lambda0~1, sigma~1), detectfn = 14)
oven.fit.h2h2 <- secr.fit(ovenCH, buffer = 300, model=list(lambda0~h2, sigma~h2), detectfn = 14)
oven.fit.a0h2 <- secr.fit(ovenCH, buffer = 300, model=list(a0~1, sigma~h2), detectfn = 14)

possum.fit.0 <- secr.fit(possumCH, buffer = 200, model=list(lambda0~1, sigma~1), detectfn = 14)
possum.fit.h2h2 <- secr.fit(possumCH, buffer = 200, model=list(lambda0~h2, sigma~h2), detectfn = 14)
possum.fit.a0h2 <- secr.fit(possumCH, buffer = 200, model=list(a0~1, sigma~h2), detectfn = 14)

ESG.fit.0 <- secr.fit(deermouse.ESG, model=list(lambda0~1, sigma~1), detectfn = 14, trace = F)
ESG.fit.h2h2 <- secr.fit(deermouse.ESG, model=list(lambda0~h2, sigma~h2), detectfn = 14, trace = F)
ESG.fit.a0h2 <- secr.fit(deermouse.ESG, model=list(a0~1, sigma~h2), detectfn = 14, trace = F)

WSG.fit.0 <- secr.fit(deermouse.WSG, model=list(lambda0~1, sigma~1), detectfn = 14, trace = F)
WSG.fit.h2h2 <- secr.fit(deermouse.WSG, model=list(lambda0~h2, sigma~h2), detectfn = 14, trace = F)
WSG.fit.a0h2 <- secr.fit(deermouse.WSG, model=list(a0~1, sigma~h2), detectfn = 14, trace = F)

## problems with multi-session run ... bad starting valuescentring or mask too coarse?
LSmask <- make.mask(LSstraps, type='trapbuffer', buffer = 20, spacing = 2)
infra.fit.0 <- secr.fit(infraCH, buffer = 20, model=list(lambda0~1, sigma~1), detectfn = 14,
                        start = c(2,-1.5, log(5)))
infra.fit.h2h2 <- secr.fit(infraCH, buffer = 20, model=list(lambda0~h2, sigma~h2), detectfn = 14,

```

```

      start = c(2,-1.5, 0, log(5), 0, 0))
infra.fit.a0h2 <- secr.fit(infraCH, buffer = 20, model=list(a0~1, sigma~h2), detectfn = 14,
      start = c(2,-1.5, log(5), 0, 0))

lineo.fit.0 <- secr.fit(lineoCH, buffer = 20, model=list(lambda0~1, sigma~1), detectfn = 14,
      start = c(2,-1.5, log(5)))
lineo.fit.h2h2 <- secr.fit(lineoCH, buffer = 20, model=list(lambda0~h2, sigma~h2), detectfn = 14,
      start = c(2,-1.5, 0, log(5), 0, 0))
lineo.fit.a0h2 <- secr.fit(lineoCH, buffer = 20, model=list(a0~1, sigma~h2), detectfn = 14,
      start = c(2,-1.5, log(5), 0, 0))

```
